# Supplementary material for: Prevalence of paucibacillary cases of leprosy in Brazil: a 20-year systematic review and meta-analysis
Source: Front Med (Lausanne). 2024 Nov 13;11:1401685. doi: 10.3389/fmed.2024.1401685 (PMC11600445; doi:10.3389/fmed.2024.1401685)
Supplement: Supplementary file 1 [file Table_1.XLSX]

## Sheet: Página1
	Título	Autores	Selection and Eligibility Criteria
1	Comportamiento epidemiológico de la lepra en varios países de América Latina, 2011-2020	Cáceres-Durán, Miguel Ángel	Duplicate
2	Reviewing the therapeutic management of leprosy in primary care: demand case series referred to a University Hospital in the Midwest region of Brazil	Sousa, Pétra Pereira de; Sousa, Ana Lúcia Maroccolo de; Turchi, Marília Dalva	Duplicate
3	Cenário epidemiológico da hanseníase e diferenças por sexo	Silva, Vitória Santos da; Braga, Isaque Oliveira; Palácio, Maria Augusta Vasconcelos; Takenami, Iukary	Included
4	Epidemiological, neurofunctional profile and prevalence of factors associated with the occurrence of physical disabilities due to leprosy in a reference center in Northeast Brasil: a sectional study	Matos, Thais Silva; Moura, José Carlos de; Fernandes, Tânia Rita Moreno de Oliveira; Souza, Carlos Dornels Freire de	Included
5	Perfil epidemiológico e distribuição espacial da hanseníase em Paulo Afonso, Bahia	Azevedo, Yasmin Pereira; Bispo, Vitor Augusto da Silva; Oliveira, Ronaldo Inácio de; Gondim, Bruno Bezerra; Santos, Sélton Diniz dos; Natividade, Márcio Santos da; Nery, Joilda Silva	Included
6	Perfil epidemiológico e tendência da hanseníase em menores de 15 anos	Santos, Álisson Neves; Costa, Ana Karla Araújo Nascimento; Souza, John Éricles Ribeiro de; Alves, Kelle Araújo Nascimento; Oliveira, Kelly Pozzi Malheiros Martins de; Pereira, Zuleide Batista	Included
7	Leprosy in children under 15 years of age in a municipality in northeastern Brazil: evolutionary aspects from 2003 to 2015	Lima Neto, Pedro Martins; Silva, Antônio Rafael da; Santos, Leonardo Hunaldo dos; Lima, Raina Jansen Cutrim Propp; Tauil, Pedro Luiz; Gonçalves, Eloísa da Graça do Rosário	Included
8	Epidemiological, temporal and spatial dynamics of leprosy in a municipality in northeastern Brazil (2008-2017): an ecological study	Albuquerque, Aldenyeslle Rodrigues de; Silva, José Victor de Mendonça; Barreto, Emiliano de Oliveira; Fraga, Carlos Alberto de Carvalho; Santos, Walcelia Oliveira dos; Silva, Maria Salésia Moreira da; Souza, Carlos Dornels Freire de; Sales-Marques, Carolin	Included
9	Estimativa da prevalência oculta da hanseníase em município do interior do Estado de São Paulo	Lima Francisco, Lara; Gomes da Silva, Clinton Fábio; Del Arco Paschoal, Vania; Tonelli Nardi, Susilene Maria	Included
10	Hanseníase em menores de 15 anos no estado do Tocantins, Brasil, 2001-2012: padrão epidemiológico e tendência temporal	Monteiro, Lorena Dias; Mello, Francisco Rogerlândio Martins; Miranda, Thayza Pereira; Heukelbach, Jorg	Excluded from reading titles and abstracts
11	Tendência temporal da hanseníase em Aracaju, Sergipe, Brasil	Moreira, Rebeca Silva; Costa, João Santos; Moreira-Junior, Vicente Trindade; Góes, Marco Aurélio de Oliveira	No data for the sample
12	Active search for cases of leprosy in the city of Manaus	Santos, Mônica; Pedrosa, Valderiza Lourenço; Pennini, Silmara Navarro; Sousa, Francisco Helder Cavalcante de	Excluded references
13	Leprosy: clinical and epidemiological study in patients above 60 years in Espírito Santo State - Brazil	Diniz, Lucia Martins; Maciel, Leonardo Bezerra	Included
14	Factors associated with leprosy in a municipality of the Pre-Amazon region, state of Maranhão, Brazil	Silva, Antônio Rafael da; Lima Neto, Pedro Martins; Santos, Leonardo Hunaldo dos; Lima, Raina Jansen Cutrim Propp; Tauil, Pedro Luiz; Gonçalves, Eloísa da Graça do Rosário	Included
15	Epidemiological profile of leprosy reactions in a referral center in Campinas (SP), Brazil, 2010-2015	Ambrosano, Letícia; Santos, Marcel Alex Soares dos; Machado, Elaine Cristina Faria Abrahão; Pegas, Elisangela Samartin	Excluded from reading titles and abstracts
16	Avaliação do desempenho de um teste rápido imunocromatográfico no diagnóstico de hanseníase em uma região endêmica no norte do Brasil	Góis, Rosineide Vieira; Travaim, Sâmela Fideles; Prata, Gabrielle Melo Calegari; Degen, Andressa Nayara; Pereira, Giselle Cristina Andrade; Wolf, Jonas Michel; Silva, Márcia Susana Nunes	Duplicate
17	Polymorphisms in the TGFB1 and IL2RA genes are associated with clinical forms of leprosy in Brazilian population	Camargo, Rodrigo Mendes de; Silva, Weber Laurentino da; Medeiros, Priscila; Belone, Andrea de Faria Fernandes; Latini, Ana Carla Pereira	Included
18	Epidemiological and geographical characterization of leprosy in a Brazilian hyperendemic municipality	Marciano, Lucia Helena Soares Camargo; Belone, Andréa de Faria Fernandes; Rosa, Patrícia Sammarco; Coelho, Neusa Maria Broch; Ghidella, Cássio César; Nardi, Susilene Maria Tonelli; Miranda, William Cabral; Barrozo, Ligia Vizeu; Lastória, Joel Carlos	Included
19	Tendências da hanseníase após implementação de um projeto de intervenção em uma capital da Região Norte do Brasil, 2002-2016	Monteiro, Lorena Dias; Lopes, Lucilene Silva Oliveira; Santos, Patrícia Rodrigues dos; Rodrigues, Allana Lima Moreira; Bastos, Whisllay Maciel; Barreto, Jaison Antonio	Excluded from reading titles and abstracts
20	Salivary anti-PGL-1 IgM may indicate active transmission of Mycobacterium leprae among young people under 16 years of age	Macedo, Alexandre Casimiro de; Cunha Jr, José Evandro; Yaochite, Juliana Navarro Ueda; Tavares, Clodis Maria; Nagao-Dias, Aparecida Tiemi	Deleted study
21	Characterization of leprosy in children under 15 years inan important municipality of north-eastern Brazil	Souza, Carlos Dornels Freire de Souza; Matos, Thais Silva	Included
22	Perfil epidemiológico da hanseníase em município hiperendêmico no nordeste do Brasil	Soares Gomes, Ana Virgínia; Marinho de Loiola, Thaisa Maria; Dias de Araújo, Olívia; Tolstenko Nogueira, Lídya; Evangelista de Araújo, Telma Maria	Included
23	Perfil sociodemográfico, clínico e epidemiológico da hanseníase em menores de quinze anos, Mato Grosso, Brasil	Freitas, Bruna Hinnah Borges Martins de; Cortela, Denise da Costa Boamorte; Ferreira, Silvana Margarida Benevides	Included
24	Leprosy among children under 15 years of age: literature review	Oliveira, Marcela Bahia Barretto de; Diniz, Lucia Martins	Excluded references
25	Epidemiological aspects of leprosy in Juazeiro-BA, from 2002 to 2012	Silva, Maria Eduarda Gomes da Cruz; Souza, Carlos Dornels Freire de; Silva, Susanne Pinheiro Costa e; Costa, Flávia Monteiro da; Carmo, Rodrigo Feliciano do	Included
26	Leprosy in a University Hospital in Southern Brazil	Lima, Adma Silva de; Pinto, Karin Cristine; Bona, Míryan Priscilla Santos; Mattos, Suelen Mayara Lopes de; Hoffmann, Marina Portiolli; Mulinari-Brenner, Fabiane Andrade; Ottoboni, Vanessa Cristhine Dallolmo	Included
27	Tendências da hanseníase no Tocantins, um estado hiperendêmico do Norte do Brasil, 2001-2012	Monteiro, Lorena Dias; Martins-Melo, Francisco Rogerlândio; Brito, Aline Lima; Lima, Mauricélia da Silveira; Alencar, Carlos Henrique; Heukelbach, Jorg	Excluded from reading titles and abstracts
28	Hanseníase em Rondônia: incidência e características dos casos notificados, 2001 a 2012	Vieira, Gabriel de Deus; Aragoso, Inês; Carvalho, Rebeca Megale Brandão; Sousa, Camila Maciel de	Included
29	Perfil de casos e fatores de risco para hanseníase, em menores de quinze anos, em município hiperendêmico da região norte do Brasil.	Franco, Mariane Cordeiro Alves; Macedo, Geraldo Mariano Moraes; Menezes, Bernardo Queiroz de; Jucá Neto, Fernando Octávio Machado; Franco, Anna Camila Alves; Xavier, Marília Brasil	Included
30	Limited activity and social participation after hospital discharge from leprosy treatment in a hyperendemic area in north Brazil	Monteiro, Lorena Dias; Alencar, Carlos Henrique; Barbosa, Jaqueline Caracas; Novaes, Candice Cristiane Barros Santana; Silva, Rita de Cássia Pereira da; Heukelbach, Jorg	Included
31	Prevalência e controle de hanseníase: pesquisa em uma ocupação urbana de São Luís, Maranhão, Brasil	Pacheco, Marcos Antonio Barbosa; Aires, Monica Lice Leite; Seixas, Emanuelle Samary	Included
32	Epidemiological situation of leprosy in Salvador from 2001 to 2009	Moreira, Shirlei Cristina; Batos, Claudilson Jose de Carvalho; Tawil, Lara	Included
33	High rates of undiagnosed leprosy and subclinical infection amongst school children in the Amazon Region	Barreto, Josafá Gonçalves; Guimarães, Layana de Souza; Frade, Marco Andrey Cipriani; Rosa, Patricia Sammarco; Salgado, Claudio Guedes	Included
34	Seroreactivity to new Mycobacterium leprae protein antigens in different leprosy-endemic regions in Brazil	Hungria, Emerith Mayra; Oliveira, Regiane Morillas de; Souza, Ana Lúcia Osório Maroclo de; Costa, Maurício Barcelos; Souza, Vânia Nieto Brito de; Silva, Eliane Aparecida; Moreno, Fátima Regina Vilani; Nogueira, Maria Esther Salles; Costa, Maria Renata Sale	Duplicate
35	Leprosy reactions: coinfections as a possible risk factor	Motta, Ana Carolina F.; Pereira, Karla Juliana; Tarquínio, Daniela Chaves; Vieira, Mariana Bellini; Miyake, Karina; Foss, Norma Tiraboschi	Duplicate
36	Epidemiological Profile of Leprosy in the Brazilian state of Piauí between 2003 and 2008	Sousa, Manoel Wilkley Gomes de; Silva, Darline Carvalho; Carneiro, Lucianna Rodrigues; Almino, Maria Luisa Brito Ferreira; Costa, Ana Lúcia França da	Included
37	Epidemiological, clinical, and operational aspects of leprosy patients assisted at a referral service in the state of Maranhão, Brazil	Corrêa, Rita da Graça Carvalhal Frazão; Aquino, Dorlene Maria Cardoso de; Caldas, Arlene de Jesus Mendes; Amaral, Dayse Karen Carneiro Rêgo; França, Fábio Silva; Mesquita, Emygdia Rosa Rêgo Barros Pires-Leal	Included
38	Seroreactivity to new Mycobacterium leprae protein antigens in different leprosy-endemic regions in Brazil	Hungria, Emerith Mayra; Oliveira, Regiane Morillas de; Souza, Ana Lúcia Osório Maroclo de; Costa, Maurício Barcelos; Souza, Vânia Nieto Brito de; Silva, Eliane Aparecida; Vilani-Moreno, Fátima Regina; Nogueira, Maria Esther Salles; Costa, Maria Renata Sale	Duplicate
39	SBD-RESP na busca ativa de casos de hanseníase	Lastória, Joel Carlos; Abreu, Marilda Aparecida Milanez Morgado de	Excluded references
40	Lepra: enfermedad milenaria y actual	Cardona Castro, Nora María; Bedoya Berrío, Gabriel	Excluded references
41	Perfil epidemiológico da hanseníase no município de Teresina, no período de 2001-2008	Pereira, Elizane Viana Eduardo; Nogueira, Lidya Tolstenko; Machado, Herion Alves da Silva; Lima, Lana Andrade Napoleão; Ramos, Clóvis Henrique Mauriz	Included
42	Perfil epidemiológico dos pacientes com hanseníase no extremo sul de Santa Catarina, no período de 2001 a 2007	Melão, Suelen; Blanco, Luis Felipe De Oliveira; Mounzer, Nage; Veronezi, Carlos Cassiano Denipotti; Simões, Priscyla Waleska Targino de Azevedo	Included
43	Perfil clínico-epidemiológico dos casos de hanseníase notificados no município de Assis Brasil, Acre, no período de 2003 a 2010	Oliart-Guzman, Humberto; Martins, Antonio Camargo; Mantovani, Saulo Augusto Silva; Pereira, Thasciany Moraes; Delfino, Breno Matos; Branco, Fernando Luiz Cunha Castelo; Braña, Athos Muniz; Campos, Rhanderson Gardinali; Oliveira, Cristieli Sérgio de Menezes	Included
44	Características epidemiológicas e clínicas das reações hansênicas em indivíduos paucibacilares e multibacilares, atendidos em dois centros de referência para hanseníase, na Cidade de Recife, Estado de Pernambuco	Teixeira, Márcia Almeida Galvão; Silveira, Vera Magalhães da; França, Emmanuel Rodrigues de	Included
45	Estudo epidemiológico de 107 focos familiares de hanseníase no município de Duque de Caxias - Rio de Janeiro, Brasil	Durães, Sandra Maria Barbosa; Guedes, Luiza Soares; Cunha, Mônica Duarte da; Magnanini, Monica Maria Ferreira; Oliveira, Maria Leide Wand Del Rey de	Included
46	Perfil do doente de hanseníase no estado da Paraíba	Simpson, Clélia Albino; Fonsêca, Leila de Cássia Tavares da; Santos, Vivianne Rafaelle Correia dos	No data for the sample
47	Hanseníase em populações indígenas do Amazonas, Brasil: um estudo epidemiológico nos municípios de Autazes, Eirunepé e São Gabriel da Cachoeira (2000 a 2005)	Imbiriba, Elsia Belo; Basta, Paulo Cesar; Pereira, Emilia dos Santos; Levino, Antônio; Garnelo, Luiza	Included
48	Lesões visíveis na hanseníase: o papel do cirurgião-dentista na suspeita de casos novos	Cortela, Denise da Costa Boamorte; Ignotti, Eliane	Duplicate
49	Hanseníase no Estado do Espírito Santo, Brasil: uma endemia em ascensão?	Moreira, Marilda Vieira; Waldman, Eliseu Alves; Martins, Cleide Lavieri	Duplicate
50	Uso do teste ML Flow em escolares diagnosticados com hanseníase no município de Paracatu, Minas Gerais	Ferreira, Isaias Nery; Ferreira, Iris Leda Camargos Silva Nery; Evangelista, Maria do Socorro Nantua; Alvarez, Rosicler Rocha Aiza	Duplicate
51	Leprosy	Hall, Brian J.; Cockerell, Clay J.; Chisholm, Cary; Jessup, Chad; Vandergriff, Travis; Motaparthi, Kiran; Elston, Dirk M.	Duplicate
52	The Many Hosts of Mycobacteria 9 (MHM9): A conference report	Klever, Abigail Marie; Alexander, Kathleen A.; Almeida, Deepak; Anderson, Matthew Z.; Ball, Ray L.; Beamer, Gillian; Boggiatto, Paola; Buikstra, Jane E.; Chandler, Bruce; Claeys, Tiffany A.; Concha, Aislinn E.; Converse, Paul J.; Derbyshire, Keith M.; Dobo	Excluded from reading titles and abstracts
53	Imported and autochthonous leprosy presenting in Madrid (1989–2015): A case series and review of the literature	Norman, Francesca F.; Fanciulli, Chiara; Pérez-Molina, José-Antonio; Monge-Maillo, Begoña; López-Vélez, Rogelio	Excluded references
54	14 - Leprosy and Tropical Diseases	Burrow, J Gordon; Rome, Keith; Padhiar, Nat	Excluded from reading titles and abstracts
55	252 - Mycobacterium leprae (Leprosy)	Renault, Cybèle A.; Ernst, Joel D.; Bennett, John E.; Dolin, Raphael; Blaser, Martin J.	Excluded from reading titles and abstracts
56	Hansen's disease (leprosy) in Japan, 1947-2020: an epidemiologic study during the declining phase to elimination	Yotsu, Rie R.; Miyamoto, Yuji; Mori, Shuichi; Ato, Manabu; Sugawara-Mikami, Mariko; Yamaguchi, Sayaka; Yamazaki, Masashi; Ozaki, Motoaki; Ishii, Norihisa	Excluded from reading titles and abstracts
57	Epidemiologic trends of leprosy for the 21st century	Schreuder, Pieter A.M.; Noto, Salvatore; Richardus, Jan Hendrik	Excluded from reading titles and abstracts
58	Reviewing the therapeutic management of leprosy in primary care: demand case series referred to a University Hospital in the Midwest region of Brazil	Sousa, Pétra Pereira de; Sousa, Ana Lúcia Maroccolo de; Turchi, Marília Dalva	Duplicate
59	Neuropathies of leprosy	Khadilkar, Satish V.; Patil, Sarika B.; Shetty, Vanaja P.	Excluded from reading titles and abstracts
60	Leprosy post-exposure prophylaxis with single-dose rifampicin (LPEP): an international feasibility programme	Richardus, Jan Hendrik; Tiwari, Anuj; Barth-Jaeggi, Tanja; Arif, Mohammad A; Banstola, Nand Lal; Baskota, Rabindra; Blaney, David; Blok, David J; Bonenberger, Marc; Budiawan, Teky; Cavaliero, Arielle; Gani, Zaahira; Greter, Helena; Ignotti, Eliane; Kamara,	Excluded references
61	Study of TNF-α, IFN-γ, TGF-β, IL-6, and IL-10 gene polymorphism in individuals from the leprosy endemic area in the Brazilian Amazon	dos Santos, Everaldina Cordeiro; Machado, Ricardo Luiz Dantas; Paz, Jasna Letícia; Silvestre, Maria do Perpétuo Socorro Corrêa Amador; Lima, Karla Valéria Batista; Lima, Luana Nepomuceno Gondim Costa	Included
62	Chapter 24 - Hansen’s Disease (Leprosy): Leprous Neuropathy	Marques, Wilson; Darras, Basil T.; Jones, H. Royden; Ryan, Monique M.; De Vivo, Darryl C.	Excluded from reading titles and abstracts
63	Chapter 91 - Leprosy	SABIN, THOMAS D.; SWIFT, THOMAS R.; JACOBSON, ROBERT R.; Dyck, Peter J.; Thomas, P.K.	Excluded from reading titles and abstracts
64	The role of BCG in prevention of leprosy: a meta-analysis	Setia, Maninder Singh; Steinmaus, Craig; Ho, Christine S; Rutherford, George W	Excluded references
65	A systematic review and meta-analysis of studies on the diagnostic accuracy and screening of tests to detect antimicrobial resistance in leprosy	Andrade, Elaine Silva Nascimento; Brandão, Jurema Guerrieri; da Silva, Juliana Souza; Kurizky, Patrícia Shu; Rosa, Patricia Sammarco; de Araújo, Wildo Navegantes; Gomes, Ciro Martins	Excluded references
66	Leprosy	Britton, Warwick J; Lockwood, Diana NJ	Duplicate
67	Leprosy	van Brakel, Wim H.; Post, Erik; Saunderson, Paul R.; Brandão, Paula Soares	Duplicate
68	Validity and reliability of the NEI VFQ-25 questionnaire in Indonesian leprosy patients	Rahayu, Tri; Menaldi, Sri Linuwih; Irawati, Yunia; Adriono, Gitalisa Andayani; Presialia, Athira; Harini, Melinda; Friska, Dewi	Excluded from reading titles and abstracts
69	Leprosy: clinical and epidemiological study in patients above 60 years in Espirito Santo State - Brazil*	Diniz, Lucia Martins; Maciel, Leonardo Bezerra	No data for the sample
70	Mycobacterium leprae is identified in the oral mucosa from paucibacillary and multibacillary leprosy patients	de Abreu, M.A.M. Morgado; Roselino, A.M.; Enokihara, M.; Nonogaki, S.; Prestes-Carneiro, L.E.; Weckx, L.L.M.; Alchorne, M.M.A.	Included
71	Chapter 40 - Leprosy (Hansen's Disease)	Lambert, Saba M.; Walker, Stephen L.; Harnisch, James P.; Sanford, Christopher A.; Pottinger, Paul S.; Jong, Elaine C.	Excluded from reading titles and abstracts
72	Chapter 38 - Leprosy	MEYERS, WAYNE M.; Guerrant, Richard L.; Walker, David H.; Weller, Peter F.	Excluded from reading titles and abstracts
73	Tuberculosis and Leprosy: Classical Granulomatous Diseases in the Twenty-First Century	Scollard, David M.; Dacso, Mara M.; Abad-Venida, Ma. Luisa	Excluded references
74	Molecular epidemiology of leprosy: An update	Avanzi, Charlotte; Singh, Pushpendra; Truman, Richard W.; Suffys, Philip N.	Excluded references
75	Genetic host resistance and susceptibility to leprosy	Mira, Marcelo Távora	Excluded from reading titles and abstracts
76	Leprosy: A glossary	Virmond, Marcos; Grzybowski, Andrzej; Virmond, Luiza	Excluded from reading titles and abstracts
77	Towards an immunodiagnostic test for leprosy	Aráoz, Romulo; Honoré, Nadine; Banu, Sayera; Demangel, Caroline; Cissoko, Yakouba; Arama, Charles; Mafij Uddin, Mohammad Khaja; Abdul Hadi, S.K.; Monot, Marc; Cho, Sang-Nae; Ji, Baohong; Brennan, Patrick J.; Sow, Samba; Cole, Stewart T.	Excluded from reading titles and abstracts
78	Active search for cases of leprosy in the city of Manaus*	Santos, Mônica; Pedrosa, Valderiza Lourenço; Pennini, Silmara Navarro; Sousa, Francisco Helder Cavalcante de	Duplicate
79	Cutaneous tuberculosis: epidemiological, clinical, diagnostic and therapeutic update	Brito, Arival Cardoso de; Oliveira, Clivia Maria Moraes de; Unger, Deborah Aben-Athar; Bittencourt, Maraya de Jesus Semblano	Excluded from reading titles and abstracts
80	Immune Reconstitution Inflammatory Syndrome and Tropical Dermatoses	Amerson, Erin Huiras; Maurer, Toby A.	Excluded from reading titles and abstracts
81	Genetics of leprosy: Expected and unexpected developments and perspectives	Sauer, Monica E.D.; Salomão, Heloisa; Ramos, Geovana B.; D`Espindula, Helena R.S.; Rodrigues, Rafael S.A.; Macedo, Wilian C.; Sindeaux, Renata H.M.; Mira, Marcelo T.	Excluded references
82	Leprosy post-exposure prophylaxis risks not adequately assessed – Author's reply	Richardus, Jan Hendrik; Mieras, Liesbeth; Saunderson, Paul; Ignotti, Eliane; Virmond, Marcos; Arif, Mohammad A; Pandey, Basu Dev; Cavaliero, Arielle; Steinmann, Peter	Excluded from reading titles and abstracts
83	Human macrophage polarization in the response to Mycobacterium leprae genomic DNA	Marin, Alberto; Van Huss, Kristopher; Corbett, John; Kim, Sangjin; Mohl, Jonathon; Hong, Bo-young; Cervantes, Jorge	Excluded from reading titles and abstracts
84	Leprosy morbidity and mortality in Brazil: 2008–2018	Miguel, Camila Botelho; da Mota, Patrício Barbosa; Afonso, Breno Oliveira; Agostinho, Ferdinando; Cazzaniga, Rodrigo Anselmo; de Abreu, Melissa Carvalho Martins; Oliveira, Carlo José Freire; Rodrigues, Wellington Francisco	No data for the sample
85	Leprosy now: epidemiology, progress, challenges, and research gaps	Rodrigues, Laura C; Lockwood, Diana NJ	Excluded from reading titles and abstracts
86	Chapter 103 - Leprosy	Britton, Warwick J.; Cohen, Jonathan; Opal, Steven M.; Powderly, William G.	Excluded from reading titles and abstracts
87	An update on the diagnosis and treatment of leprosy	Moschella, Samuel L.	Excluded from reading titles and abstracts
88	Mycobacterium infections	González-Martínez, A.; Olivares-Duran, M.J.; Gutiérrez-Bautista, Juan Francisco; Reguera Márquez, J.A.; Aliaga, Luis; Rodríguez-Granger, Javier; Rezaei, Nima	Excluded from reading titles and abstracts
89	CHAPTER 109 - LEPROSY AND BURULI ULCER: THE MAJOR CUTANEOUS MYCOBACTERIOSES All material in this chapter is in the public domain, with the exception of any borrowed figures or tables.	Meyers, Wayne M.; Walsh, Douglas S.; Feigin, Ralph D.; Cherry, James D.; Demmler-Harrison, Gail J.; Kaplan, Sheldon L.	Excluded from reading titles and abstracts
90	Chapter 58 - Leprosy	Withington, Stephen G.; Cook, Gordon C.; Zumla, Alimuddin I.	Excluded from reading titles and abstracts
91	Epidemiological characteristics of leprosy from 2000 to 2019 in a state with low endemicity in southern Brazil	Moraes, Paulo Cezar de; Eidt, Letícia Maria; Koehler, Alessandra; Ransan, Leonardo Girardi; Scrofeneker, Maria Lúcia	Included
92	Epidemiological aspects of leprosy	Sarode, Gargi; Sarode, Sachin; Anand, Rahul; Patil, Shankargouda; Jafer, Mohammed; Baeshen, Hosam; Awan, Kamran Habib	Excluded from reading titles and abstracts
93	Mycobacterium leprae–helminth co-infections and vitamin D deficiency as potential risk factors for leprosy: A case–control study in south-eastern Brazil	Dennison, Cori L.; de Oliveira, Lorena B.; Fraga, Lucia A. de O.; e Lima, Rosemary S.; Ferreira, José A.; Clennon, Julie A.; de Mondesert, Laura; Stephens, Jessica; Magueta, Erica B.; Castelo Branco, Alexandre; Rezende, Michelle de Carvalho; Negrão-Corrêa,	Included
94	Spatial and temporal epidemiology of Mycobacterium leprae infection among leprosy patients and household contacts of an endemic region in Southeast Brazil	Nicchio, Mariana V.C.; Araujo, Sergio; Martins, Lorraine C.; Pinheiro, Andressa V.; Pereira, Daniela C.; Borges, Angélica; Antunes, Douglas E.; Barreto, Josafá G.; Goulart, Isabela Maria B.	Included
95	Report of two cases of lepromatous leprosy at an early age	Dorilêo, Gabriela Belmonte; Cavalcante, Leticia Rossetto da Silva; Lopes, José Cabral; Damazo, Amilcar Sabino	Excluded from reading titles and abstracts
96	Nasal mucosa study of leprosy contacts with positive serology for the phenolic glycolipid 1 antigen	Martins, Ana Cristina da Costa; Miranda, Alice; Oliveira, Maria Leide Wan-del-Rey de; Bührer-Sékula, Samira; Martinez, Alejandra	Included
97	Chapter 93 - Mycobacterium leprae	Gillis, Thomas P.; Tang, Yi-Wei; Sussman, Max; Liu, Dongyou; Poxton, Ian; Schwartzman, Joseph	Excluded from reading titles and abstracts
98	Socioeconomic determinants of leprosy new case detection in the 100 Million Brazilian Cohort: a population-based linkage study	Nery, Joilda Silva; Ramond, Anna; Pescarini, Julia Moreira; Alves, André; Strina, Agostino; Ichihara, Maria Yury; Fernandes Penna, Maria Lucia; Smeeth, Liam; Rodrigues, Laura C; Barreto, Mauricio L; Brickley, Elizabeth B; Penna, Gerson Oliveira	Duplicate
99	Ocular leprosy	Grzybowski, Andrzej; Nita, Małgorzata; Virmond, Marcos	Excluded from reading titles and abstracts
100	Mycobacterium leprae in Colombia described by SNP7614 in gyrA, two minisatellites and geography	Cardona-Castro, Nora; Beltrán-Alzate, Juan Camilo; Romero-Montoya, Irma Marcela; Li, Wei; Brennan, Patrick J.; Vissa, Varalakshmi	Excluded from reading titles and abstracts
101	Ninjurin 1 asp110ala single nucleotide polymorphism is associated with protection in leprosy nerve damage	Cardoso, Cynthia Chester; Martinez, Alejandra Nóbrega; Guimarães, Pedro Edson Moreira; Mendes, Camila Teixeira; Pacheco, Antônio Guilherme; de Oliveira, Rosane Barbosa; Teles, Rosane Magda Brandão; Illarramendi, Ximena; Sampaio, Elizabeth Pereira; Sarno, E	Excluded from reading titles and abstracts
102	Update on the epidemiology, diagnosis, and treatment of leprosy	Reibel, F.; Cambau, E.; Aubry, A.	Excluded from reading titles and abstracts
103	Unwelcome prevalence of leishmaniasis with several other infectious diseases	Saini, Isha; Joshi, Jyoti; Kaur, Sukhbir	Excluded from reading titles and abstracts
104	Diagnostic accuracy of tests for leprosy: a systematic review and meta-analysis	Gurung, P.; Gomes, C.M.; Vernal, S.; Leeflang, M.M.G.	Excluded from reading titles and abstracts
105	Chapter 30 - Engineered biomarkers for immunodiagnosis of leprosy	Soares, Bruno Araujo; Stanke Scandelari, João Paulo; Wagatuma Bottolo, Bruna Mayumi; de Moura, Juliana; Faintuch, Joel; Faintuch, Salomao	Excluded from reading titles and abstracts
106	Development of treatment-decision algorithms for children evaluated for pulmonary tuberculosis: an individual participant data meta-analysis	Gunasekera, Kenneth S; Marcy, Olivier; Muñoz, Johanna; Lopez-Varela, Elisa; Sekadde, Moorine P; Franke, Molly F; Bonnet, Maryline; Ahmed, Shakil; Amanullah, Farhana; Anwar, Aliya; Augusto, Orvalho; Aurilio, Rafaela Baroni; Banu, Sayera; Batool, Iraj; Brand	Excluded from reading titles and abstracts
107	Mycobacterium leprae DNA in peripheral blood may indicate a bacilli migration route and high-risk for leprosy onset	Reis, E.M.; Araujo, S.; Lobato, J.; Neves, A.F.; Costa, A.V.; Gonçalves, M.A.; Goulart, L.R.; Goulart, I.M.B.	Included
108	Chapter 41 - Leprosy	Ooi, Winnie W.; Srinivasan, Jayashri; Aminoff, Michael J.; Josephson, S. Andrew	Excluded from reading titles and abstracts
109	Lucio’s leprosy: A clinical and therapeutic challenge	Jurado, Fermin; Rodriguez, Obdulia; Novales, Josefa; Navarrete, Gisela; Rodriguez, Myrna	Excluded from reading titles and abstracts
110	Mycobacterium Leprae Infections	Hant, Paula; Kotra, Lakshmi P.; Enna, S.J.; Bylund, David B.	Excluded from reading titles and abstracts
111	CHAPTER 34 - Leprosy	Joyce, M. Patricia; Walker, Patricia Frye; Barnett, Elizabeth D.	Excluded from reading titles and abstracts
112	9 - Natural antileprotic agents: a boon for the management of leprosy	Nabi, Bushra; Rehman, Saleha; Baboota, Sanjula; Ali, Javed; Brahmachari, Goutam	Excluded references
113	CHAPTER 57 - Leprosy	Lockwood, Diana; Marlowe, Sharon; Lambert, Saba; Finch, Roger G.; Greenwood, David; Norrby, S. Ragnar; Whitley, Richard J.	Excluded from reading titles and abstracts
114	Innovative tools and approaches to end the transmission of Mycobacterium leprae	Steinmann, Peter; Reed, Steven G; Mirza, Fareed; Hollingsworth, T Déirdre; Richardus, Jan Hendrik	Excluded from reading titles and abstracts
115	The GATA3 gene is involved in leprosy susceptibility in Brazilian patients	Medeiros, Priscila; da Silva, Weber Laurentino; de Oliveira Gimenez, Bruna Beatriz; Vallezi, Keren Bastos; Moraes, Milton Ozório; de Souza, Vânia Niéto Brito; Latini, Ana Carla Pereira	Excluded from reading titles and abstracts
116	Chapter Two - Mathematical Modelling of Leprosy and Its Control	Blok, David J.; de Vlas, Sake J.; Fischer, Egil A.J.; Richardus, Jan Hendrik; Anderson, Roy M.; Basáñez, Maria Gloria	Excluded from reading titles and abstracts
117	Effect of a conditional cash transfer programme on leprosy treatment adherence and cure in patients from the nationwide 100 Million Brazilian Cohort: a quasi-experimental study	Pescarini, Julia M; Williamson, Elizabeth; Nery, Joilda S; Ramond, Anna; Ichihara, Maria Yury; Fiaccone, Rosemeire L; Penna, Maria Lucia F; Smeeth, Liam; Rodrigues, Laura C; Penna, Gerson O; Brickley, Elizabeth B; Barreto, Mauricio L	No data for the sample
118	Chapter 19 - Bacterial Diseases of the Nervous System	Faucher, Jean-François; Ploy, Marie-Cécile; Preux, Pierre-marie; Dumas, Michel	Excluded from reading titles and abstracts
119	Leprosy	Milner, Danny A.; Pecora, Nicole; Solomon, Isaac; Soong, Thing Rinda	Duplicate
120	41 - Leprosy	Walker, Stephen L.; Withington, Stephen G.; Lockwood, Diana N.J.; Farrar, Jeremy; Hotez, Peter J.; Junghanss, Thomas; Kang, Gagandeep; Lalloo, David; White, Nicholas J.	Excluded from reading titles and abstracts
121	The Current Challenge of Imported Leprosy in Spain: A Study of 7 Cases	Contreras-Steyls, M.; López-Navarro, N.; Herrera-Acosta, E.; Castillo, R.; Ruiz del Portal, G.; Bosch, R.J.; Herrera, E.	Excluded from reading titles and abstracts
122	Chapter 28 - Leprous neuropathy	de Freitas, Marcos R.G.; Said, Gérard; Said, Gérard; Krarup, Christian	Excluded from reading titles and abstracts
123	Social inequalities and their association with the leprosy burden in a Brazilian city of low endemicity: An ecological study	Ramos, Antônio Carlos Vieira; Alonso, Jonas Bodini; Berra, Thaís Zamboni; Alves, Luana Seles; Martoreli Júnior, José Francisco; Santos, Felipe Lima dos; Alves, Yan Mathias; Andrade, Hamilton Leandro Pinto de; Costa, Fernanda Bruzadelli Paulino da; Crispim,	Included
124	Clinical trial for uniform multidrug therapy for leprosy patients in Brazil (U-MDT/CT-BR): adverse effects approach*	Cruz, Rossilene Conceição da Silva; Bührer-Sékula, Samira; Penna, Gerson Oliveira; Moraes, Maria Elisabete Amaral de; Gonçalves, Heitor de Sá; Stefani, Mariane Martins de Araújo; Penna, Maria Lúcia Fernandes; Pontes, Maria Araci de Andrade; Talhari, Sinési	No data for the sample
125	334 - Leprosy (Hansen's Disease)	Ernst, Joel D.; Goldman, Lee; Schafer, Andrew I.	Excluded from reading titles and abstracts
126	Clinical aspects of leprosy	Talhari, Carolina; Talhari, Sinésio; Penna, Gerson Oliveira	Excluded from reading titles and abstracts
127	Dynamical analysis and design of computational methods for nonlinear stochastic leprosy epidemic model	Raza, Ali; Awrejcewicz, Jan; Rafiq, Muhammad; Ahmed, Nauman; Ehsan, Muhammad Sarwar; Mohsin, Muhammad	Excluded from reading titles and abstracts
128	Trend of pediatric leprosy in an endemic area in Northeast of Brazil, 2008–2018	Gama, Maria Eugênia Farias; Pereira, Aline de Paula Caetano	Duplicate
129	Dynamics of Mycobacterium leprae transmission in environmental context: Deciphering the role of environment as a potential reservoir	Turankar, Ravindra P.; Lavania, Mallika; Singh, Mradula; Siva Sai, Krovvidi S.R.; Jadhav, Rupendra S	Excluded from reading titles and abstracts
130	CHAPTER 37 - Leprosy	Walsh, Douglas S.; Meyers, Wayne M.; Guerrant, Richard L.; Walker, David H.; Weller, Peter F.	Excluded from reading titles and abstracts
131	Leprosy	Walker, Stephen L.; Lockwood, Dina N.J.	Duplicate
132	Cutaneous tuberculosis. Part I: Pathogenesis, classification, and clinical features	Kaul, Subuhi; Kaur, Ishmeet; Mehta, Shilpa; Singal, Archana	Excluded from reading titles and abstracts
133	Detection of Mycobacterium leprae in nasal mucosa biopsies by the polymerase chain reaction	Patrocínio, Lucas Gomes; Goulart, Isabela Maria Bernardes; Goulart, Luiz Ricardo; Patrocínio, José Antônio; Ferreira, Frederico Rogério; Fleury, Raul Negrão	Included
134	Acquired disorders with hypopigmentation: A clinical approach to diagnosis and treatment	Saleem, Mohammed D.; Oussedik, Elias; Picardo, Mauro; Schoch, Jennifer J.	Excluded from reading titles and abstracts
135	Tropical dermatology: Bacterial tropical diseases	Lupi, Omar; Madkan, Vandana; Tyring, Stephen K.	Excluded from reading titles and abstracts
136	Leprosy: A great imitator	Kundakci, Nihal; Erdem, Cengizhan	Excluded from reading titles and abstracts
137	Forecasting the new case detection rate of leprosy in four states of Brazil: A comparison of modelling approaches	Blok, David J.; Crump, Ronald E.; Sundaresh, Ram; Ndeffo-Mbah, Martial; Galvani, Alison P.; Porco, Travis C.; de Vlas, Sake J.; Medley, Graham F.; Richardus, Jan Hendrik	Excluded from reading titles and abstracts
138	Leprosy: Clinical aspects and diagnostic techniques	Maymone, Mayra B.C.; Laughter, Melissa; Venkatesh, Samantha; Dacso, Mara M.; Rao, P. Narasimha; Stryjewska, Barbara M.; Hugh, Jeremy; Dellavalle, Robert P.; Dunnick, Cory A.	Excluded from reading titles and abstracts
139	Genetics of leprosy: Expected—and unexpected—developments and perspectives	Sauer, Monica E.D.; Salomão, Heloisa; Ramos, Geovana B.; D’Espindula, Helena R.S.; Rodrigues, Rafael S.A.; Macedo, Wilian C.; Sindeaux, Renata H.M.; Mira, Marcelo T.	Excluded from reading titles and abstracts
140	The effect of conditional cash transfers on the control of neglected tropical disease: a systematic review	Ahmed, Aaminah; Aune, Dagfinn; Vineis, Paolo; Pescarini, Julia M; Millett, Christopher; Hone, Thomas	Excluded from reading titles and abstracts
141	Leprosy epidemics during history increased protective allele frequency of PARK2/PACRG genes in the population of the Mljet Island, Croatia	Bakija-Konsuo, A.; Mulić, R.; Boraska, V.; Pehlic, M.; Huffman, J.E.; Hayward, C.; Marlais, M.; Zemunik, T.; Rudan, I.	Not related to theme
142	Hot spots of leprosy in the endemic area of São Luís, Maranhão State, Northeastern Brazil	de Sousa, Delma B.; Souza-Santos, Reinaldo; Duarte da Cunha, Mônica; Sobral, Andréa	No data for the sample
143	Multiple sclerosis (MS) and leprosy: First case report and literature review	Ribeiro, T.	Excluded references
144	Oral mucosa as a source of Mycobacterium leprae infection and transmission, and implications of bacterial DNA detection and the immunological status	Martinez, T.S.; Figueira, M.M.N.R; Costa, A.V.; Gonçalves, M.A.; Goulart, L.R.; Goulart, I.M.B.	Not related to theme
145	Trend of pediatric leprosy in an endemic area in Northeast of Brazil, 2008–2018	Gama, Maria Eugênia Farias; Pereira, Aline de Paula Caetano	Duplicate
146	Opportunistic tropical infections in immunosuppressed patients	Shu Kurizky, Patrícia; dos Santos Neto, Leopoldo Luiz; Barbosa Aires, Rodrigo; Henrique da Mota, Licia Maria; Martins Gomes, Ciro	Not related to theme
147	Molecular mechanisms of MHC linked susceptibility in leprosy: towards the development of synthetic vaccines	Gorodezky, Clara; Alaez, Carmen; Munguı́a, Andrea; Cruz, Rocı́o; Vazquez, Alejandra; Camacho, Alejandra; Flores, Oscar; Rodriguez, Mirna; Rodriguez, Obdulia	Excluded from reading titles and abstracts
148	Chapter 36 - Leprosy (Hansen's Disease)	Joyce, M. Patricia; Jong, Elaine C.; Sanford, Christopher	Excluded from reading titles and abstracts
149	Hanseniasis in the municipality of Western Amazon (Acre, Brazil): are we far from the goal of the World Health Organization?: Hansen and Western Amazon	Araújo, Francisco A.; Abreu, Luiz C.; Laporta, Gabriel Z.; Santos, Vinicius S.; Moreira, Jose G.V.; Grumach, Anete S.	Included
150	Chapter 6 - Host Genetics and Susceptibility to Infection	WILKINSON, ROBERT JOHN; LEVIN, MICHAEL; PASVOL, GEOFFREY; Guerrant, Richard L.; Walker, David H.; Weller, Peter F.	Excluded from reading titles and abstracts
151	Chapter 22 - Mycobacteria	Tyring, Stephen K.; Lupi, Omar; Hengge, Ulrich R.	Excluded from reading titles and abstracts
152	Tropical Dermatology	Tyring, Stephen K.; Lupi, Omar; Hengge, Ulrich R.	Excluded from reading titles and abstracts
153	Chapter 19 - Dermatological Problems	Chopra, Sunil; Knight, Mario A.; Vega-Lopez, Francisco; Cook, Gordon C.; Zumla, Alimuddin I.	Excluded from reading titles and abstracts
154	7 - Non-Hepatotropic Viral, Bacterial, and Parasitic Infections of the Liver	Zaki, Sherif R.; Alves, Venancio A.F.; Hale, Gillian L.; Burt, Alastair D.; Ferrell, Linda D.; Hübscher, Stefan G.	Excluded from reading titles and abstracts
155	The Travel and Tropical Medicine Manual (Fourth Edition)	Jong, Elaine C.; Sanford, Christopher	Excluded from reading titles and abstracts
156	Chapter 11 - Bacterial Infections	Roberts, Charlotte A.; Buikstra, Jane E.; Buikstra, Jane E.	Excluded from reading titles and abstracts
157	Hunter's Tropical Medicine and Emerging Infectious Disease (Ninth Edition)	Magill, Alan J.; Hill, David R; Solomon, Tom; Ryan, Edward T	Excluded from reading titles and abstracts
158	99 - HIV/AIDS-Related Problems in Low- and Middle-Income Countries	Reynolds, Steven J.; Billioux, Alexander C.; Quinn, Thomas C.; Cohen, Jonathan; Powderly, William G.; Opal, Steven M.	Excluded from reading titles and abstracts
159	8 - Diseases of the Alimentary Tract–Ruminant	Constable, Peter D.; Hinchcliff, Kenneth W.; Done, Stanley H.; Grünberg, Walter	Excluded from reading titles and abstracts
160	4 - Genetics of Susceptibility and Resistance to Infection	Cobat, Aurelie; Orlova, Marianna; Alcaїs, Alexandre; Schurr, Erwin; Kabelitz, Dieter; Kaufmann, Stefan H.E.	Excluded from reading titles and abstracts
161	68 - Dermatological Problems	Vega-Lopez, Francisco; Ritchie, Sara; Farrar, Jeremy; Hotez, Peter J.; Junghanss, Thomas; Kang, Gagandeep; Lalloo, David; White, Nicholas J.	Excluded from reading titles and abstracts
162	8 - Other viral and infectious diseases and HIV-related liver disease	Lucas, Sebastian B.; Zaki, Sherif R.; Portmann, Bernard C.; Burt, Alastair D.; Portmann, Bernard C.; Ferrell, Linda D.	Excluded from reading titles and abstracts
163	22 - Mycobacteria	Tyring, Stephen K.; Lupi, Omar; Hengge, Ulrich R.	Excluded from reading titles and abstracts
164	Index	Cohen, Jonathan; Powderly, William G.; Opal, Steven M.	Duplicate
165	Road map to the treatment of neglected tropical diseases: Nanocarriers interventions	Joshi, Garima; Quadir, Sheikh Shahnawaz; Yadav, Khushwant S.	Excluded from reading titles and abstracts
166	Index	Nabarro, Laura; Morris-Jones, Stephen; Moore, David A.J.	Duplicate
167	Dermatological Signs of Internal Disease (Fourth Edition)	Callen, Jeffrey P.; Jorizzo, Joseph L.; Bolognia, Jean L.; Piette, Warren W.; Zone, John J.	Excluded from reading titles and abstracts
168	Index	Preux, Pierre-marie; Dumas, Michel	Duplicate
169	Tropical Infectious Diseases: Principles, Pathogens and Practice (Third Edition)	Guerrant, Richard L.; Walker, David H.; Weller, Peter F.	Excluded from reading titles and abstracts
170	Infectious Diseases (Third Edition)	Cohen, Jonathan; Opal, Steven M.; Powderly, William G.	Excluded from reading titles and abstracts
171	Chapter 61 - Tuberculosis Vaccines	Hanekom, Willem A.; Hawn, Thomas R.; Ginsberg, Ann M.; Orenstein, Walter; Offit, Paul; Edwards, Kathryn M.; Plotkin, Stanley	Excluded from reading titles and abstracts
172	Index	Sanford, Christopher A.; Pottinger, Paul S.; Jong, Elaine C.	Duplicate
173	Subject index		Duplicate
174	Chapter 96 - HIV/AIDS-related problems in developing countries	Reynolds, Stephen J; Spacek, Lisa A; Quinn, Thomas C; Cohen, Jonathan; Opal, Steven M.; Powderly, William G.	Excluded from reading titles and abstracts
175	Subject Index		Duplicate
176	60 - Tuberculosis Vaccines	Hanekom, Willem A.; Hawn, Thomas R.; Ginsberg, Ann M.; Plotkin, Stanley A.; Orenstein, Walter A.; Offit, Paul A.; Edwards, Kathryn M.	Excluded from reading titles and abstracts
177	Chapter 3 - Specific Infectious Diseases	Burns, Daniel S.; Lamb, Lucy; Chambers, James	Excluded from reading titles and abstracts
178	- Infectious and Parasitic Diseases of the Alimentary Tract	Maxie, M. Grant	Excluded from reading titles and abstracts
179	Abstracts accepted for publication only		Excluded from reading titles and abstracts
180	The epidemiology, pathogenesis, transmission, diagnosis, and management of multidrug-resistant, extensively drug-resistant, and incurable tuberculosis	Dheda, Keertan; Gumbo, Tawanda; Maartens, Gary; Dooley, Kelly E; McNerney, Ruth; Murray, Megan; Furin, Jennifer; Nardell, Edward A; London, Leslie; Lessem, Erica; Theron, Grant; van Helden, Paul; Niemann, Stefan; Merker, Matthias; Dowdy, David; Van Rie, An	Excluded from reading titles and abstracts
181	Chapter 39 - Mycobacterial Infections	Shingadia, Delane; Burgner, David; Taussig, Lynn M.; Landau, Louis I.	Excluded from reading titles and abstracts
182	Chapter 17 - Miscellaneous Infections of the Liver	Herman, Rachel Baden; Koziel, Margaret James; Bacon, Bruce R; O'Grady, John G; Di Bisceglie, Adrian M; Lake, John R; Howdle, Peter D	Excluded from reading titles and abstracts
183	108 - Infectious arthritis II: Mycobacterial, brucellar, fungal, and parasitic arthritis	Marquez, Javier; Espinoza, Luis R.; Hochberg, Marc C.; Silman, Alan J.; Smolen, Josef S.; Weinblatt, Michael E.; Weisman, Michael H.	Excluded from reading titles and abstracts
184	Chapter 129 - Ocular Disease	RYAN, EDWARD T.; DURAND, MARLENE; Guerrant, Richard L.; Walker, David H.; Weller, Peter F.	Excluded from reading titles and abstracts
185	4 - Infections Acquired by Airborne Transmission	Nabarro, Laura; Morris-Jones, Stephen; Moore, David A.J.; Nabarro, Laura; Morris-Jones, Stephen; Moore, David A.J.	Excluded from reading titles and abstracts
186	Comprehensive electrophysiology in leprous neuropathy – Is there a clinico-electrophysiological dissociation?	Kumar, Neeraj; Malhotra, Hardeep Singh; Garg, Ravindra Kumar; Lalla, Rakesh; Malhotra, Kiran Preet; Jain, Amita; Rizvi, Imran	Excluded from reading titles and abstracts
187	Chapter 133 - Approach to the Patient with HIV and Coinfecting Tropical Infectious Diseases	KARP, CHRISTOPHER L.; COLEBUNDERS, ROBERT; Guerrant, Richard L.; Walker, David H.; Weller, Peter F.	Excluded from reading titles and abstracts
188	Leprosy survey among rural communities and wild armadillos from Amazonas state, Northern Brazil.	Stefani MMA; Rosa PS; Costa MB; Schetinni APM; Manhães I; Pontes MAA; Costa P; Fachin LRV; Batista IMFD; Virmond M; Pereira E; Penna MLF; Penna GO	No data for the sample
189	Misdiagnosis of leprosy in Brazil in the period 2003 - 2017: spatial pattern and associated factors.	Neves KVRN; Nobre ML; Machado LMG; Steinmann P; Ignotti E	No data for the sample
190	Leprosy: clinical and epidemiological study in patients above 60 years in Espírito Santo State - Brazil.	Diniz LM; Maciel LB	Excluded from reading titles and abstracts
191	Epidemiological, temporal and spatial dynamics of leprosy in a municipality in northeastern Brazil (2008-2017): an ecological study.	Albuquerque AR; Silva JVM; Barreto EO; Fraga CAC; Santos WOD; Silva MSMD; Souza CDF; Sales-Marques C	No data for the sample
192	Laboratory diagnosis of leprosy: Two staining methods from bacilloscopy and rapid ml flow test.	Ule Belotti NC; Tonelli Nardi SM; Arco Paschoal VD; Martins Montanha JO; Paro Pedro HDS; Gazetta CE	Excluded from reading titles and abstracts
193	Proposing a Compartmental Model for Leprosy and Parameterizing Using Regional Incidence in Brazil.	Smith RL	Excluded from reading titles and abstracts
194	Spatial analysis of epidemiological and quality indicators of health services for leprosy in hyperendemic areas in Northeastern Brazil.	Barbosa CC; Bonfim CVD; Brito CMG; Souza WV; Melo MFO; Medeiros ZM	Included
195	Mycobacterium leprae is identified in the oral mucosa from paucibacillary and multibacillary leprosy patients.	Morgado de Abreu MA; Roselino AM; Enokihara M; Nonogaki S; Prestes-Carneiro LE; Weckx LL; Alchorne MM	Excluded from reading titles and abstracts
196	Leprosy Reactions in Patients Coinfected with HIV: Clinical Aspects and Outcomes in Two Comparative Cohorts in the Amazon Region, Brazil.	Pires CA; Jucá Neto FO; de Albuquerque NC; Macedo GM; Batista Kde N; Xavier MB	Excluded from reading titles and abstracts
197	Epidemiological, clinical, and operational aspects of leprosy patients assisted at a referral service in the state of Maranhão, Brazil.	Corrêa Rda G; Aquino DM; Caldas Ade J; Amaral DK; França FS; Mesquita ER	Excluded from reading titles and abstracts
198	Limited activity and social participation after hospital discharge from leprosy treatment in a hyperendemic area in North Brazil.	Monteiro LD; Alencar CH; Barbosa JC; Novaes CC; da Silva Rde C; Heukelbach J	Excluded from reading titles and abstracts
199	Epidemiological situation of leprosy in Salvador from 2001 to 2009.	Moreira SC; Batos CJ; Tawil L	Excluded from reading titles and abstracts
200	Uniform multidrug therapy for leprosy patients in Brazil (U-MDT/CT-BR): Results of an open label, randomized and controlled clinical trial, among multibacillary patients.	Penna GO; Bührer-Sékula S; Kerr LRS; Stefani MMA; Rodrigues LC; de Araújo MG; Ramos AMC; de Andrade ARC; Costa MB; Rosa PS; Gonçalves HS; Cruz R; Barreto ML; Pontes MAA; Penna MLF	Excluded from reading titles and abstracts
201	Epidemiological and geographical characterization of leprosy in a Brazilian hyperendemic municipality.	Marciano LHSC; Belone AFF; Rosa PS; Coelho NMB; Ghidella CC; Nardi SMT; Miranda WC; Barrozo LV; Lastória JC	Excluded from reading titles and abstracts
202	Epidemiological profile and tendency of leprosy in people younger than 15 years.	Santos ÁN; Costa AKAN; Souza JÉR; Alves KAN; Oliveira KPMM; Pereira ZB	Excluded from reading titles and abstracts
203	[Leprosy in indigenous populations of Amazonas State, Brazil: an epidemiological study in the counties of Autazes, Eirunepé and São Gabriel da Cachoeira (2000 to 2005)].	Imbiriba EB; Basta PC; Pereira Edos S; Levino A; Garnelo L	Excluded from reading titles and abstracts
204	Factors associated with leprosy in a municipality of the Pre-Amazon region, state of Maranhão, Brazil.	Silva ARD; Lima Neto PM; Santos LHD; Lima RJCP; Tauil PL; Gonçalves EDGDR	Excluded from reading titles and abstracts
205	Leprosy among children under 15 years of age: literature review.	Oliveira MB; Diniz LM	Excluded from reading titles and abstracts
206	Leprosy Screening Based on Artificial Intelligence: Development of a Cross-Platform App.	De Souza MLM; Lopes GA; Branco AC; Fairley JK; Fraga LAO	Excluded from reading titles and abstracts
207	Can baseline ML Flow test results predict leprosy reactions? An investigation in a cohort of patients enrolled in the uniform multidrug therapy clinical trial for leprosy patients in Brazil.	Hungria EM; Oliveira RM; Penna GO; Aderaldo LC; Pontes MA; Cruz R; Gonçalves HS; Penna ML; Kerr LR; Stefani MM; Bührer-Sékula S	Excluded from reading titles and abstracts
208	Understanding the type 1 reactional state for early diagnosis and treatment: a way to avoid disability in leprosy.	Nery JA; Bernardes Filho F; Quintanilha J; Machado AM; Oliveira Sde S; Sales AM	Excluded from reading titles and abstracts
209	Polymorphisms in the TGFB1 and IL2RA genes are associated with clinical forms of leprosy in Brazilian population.	Camargo RM; Silva WLD; Medeiros P; Belone AFF; Latini ACP	Excluded from reading titles and abstracts
210	Conditional Cash Transfer Program and Leprosy Incidence: Analysis of 12.9 Million Families From the 100 Million Brazilian Cohort.	Pescarini JM; Williamson E; Ichihara MY; Fiaccone RL; Forastiere L; Ramond A; Nery JS; Penna MLF; Strina A; Reis S; Smeeth L; Rodrigues LC; Brickley EB; Penna GO; Barreto ML	Excluded from reading titles and abstracts
211	Risk Factors for Physical Disability in Patients With Leprosy: A Systematic Review and Meta-analysis.	de Paula HL; de Souza CDF; Silva SR; Martins-Filho PRS; Barreto JG; Gurgel RQ; Cuevas LE; Santos VS	Excluded from reading titles and abstracts
212	Description of leprosy classification at baseline among patients enrolled at the uniform multidrug therapy clinical trial for leprosy patients in Brazil.	Moura RS; Penna GO; Cardoso LP; de Andrade Pontes MA; Cruz R; de Sá Gonçalves H; Fernandes Penna ML; de Araújo Stefani MM; Bührer-Sékula S	Excluded from reading titles and abstracts
213	Leprosy in children under 15 years of age in a municipality in northeastern Brazil: evolutionary aspects from 2003 to 2015.	Lima Neto PM; Silva ARD; Santos LHD; Lima RJCP; Tauil PL; Gonçalves EDGDR	Excluded from reading titles and abstracts
214	Leprosy among schoolchildren in the Amazon region: A cross-sectional study of active search and possible source of infection by contact tracing.	Pedrosa VL; Dias LC; Galban E; Leturiondo A; Palheta J Jr; Santos M; Moraes MO; Talhari C	Included
215	Risk and protective factors for leprosy development determined by epidemiological surveillance of household contacts.	Goulart IM; Bernardes Souza DO; Marques CR; Pimenta VL; Gonçalves MA; Goulart LR	Included
216	Prevalence of autoantibodies against cellular antigens in patients with HIV and leprosy coinfection in the Amazon region.	Bichara CNC; Bichara CDA; Tostes C; Povoa MM; Quaresma JAS; Xavier MB	Excluded from reading titles and abstracts
217	High rates of undiagnosed leprosy and subclinical infection amongst school children in the Amazon Region.	Barreto JG; Guimarães Lde S; Frade MA; Rosa PS; Salgado CG	Excluded from reading titles and abstracts
218	The red flags of ulnar neuropathy in leprosy.	Jardim M; Vital RT; Illarramendi X; Hacker M; Junqueira B; Pitta IJR; Pinheiro RO; Sarno EN	Excluded from reading titles and abstracts
219	Leprosy serology (ML Flow test) in borderline leprosy patients classified as paucibacillary by counting cutaneous lesions: an useful tool.	Barreto JA; Nogueira ME; Diorio SM; Bührer-Sékula S	Excluded from reading titles and abstracts
220	Leprosy reactions: coinfections as a possible risk factor.	Motta AC; Pereira KJ; Tarquínio DC; Vieira MB; Miyake K; Foss NT	Excluded from reading titles and abstracts
221	Seroreactivity to new Mycobacterium leprae protein antigens in different leprosy-endemic regions in Brazil.	Hungria EM; Oliveira RM; Souza AL; Costa MB; Souza VN; Silva EA; Moreno FR; Nogueira ME; Costa MR; Silva SM; Bührer-Sékula S; Reed SG; Duthie MS; Stefani MM	Excluded from reading titles and abstracts
222	Examining ERBB2 as a candidate gene for susceptibility to leprosy (Hansen's disease) in Brazil.	Araújo SR; Jamieson SE; Dupnik KM; Monteiro GR; Nobre ML; Dias MS; Trindade Neto PB; Queiroz Mdo C; Gomes CE; Blackwell JM; Jeronimo SM	Excluded from reading titles and abstracts
223	Reviewing the therapeutic management of leprosy in primary care: demand case series referred to a University Hospital in the Midwest region of Brazil.	Sousa PP; Sousa ALM; Turchi MD	Included
224	Correlation between therapy and lipid profile of leprosy patients: is there a higher risk for developing cardiovascular diseases after treatment?	Silva RVG; de Araújo RS; Aarão TLS; da Silva Costa PD; Sousa JR; Quaresma JAS	Excluded from reading titles and abstracts
225	Epidemiological aspects of leprosy in Juazeiro-BA, from 2002 to 2012.	Silva ME; de Souza CD; Costa e Silva SP; Costa FM; Carmo RF	Excluded from reading titles and abstracts
226	Serological evidence of Toxoplasma gondii infection as potential risk for the development of lepromatous leprosy in an endemic area for both neglected tropical diseases in Brazil.	Oliveira LRP; Martins LM; Souza RDC; Scheidegger de Castro Y; Nascimento LS; da Silva JA; Nahn Junior EP; da Silva WD; Peixoto-Rangel AL	Included
227	High frequency of M. leprae DNA detection in asymptomatic household contacts.	Gama RS; Gomides TAR; Gama CFM; Moreira SJM; de Neves Manta FS; de Oliveira LBP; Marçal PHF; Sarno EN; Moraes MO; Garcia RMG; de Oliveira Fraga LA	Excluded from reading titles and abstracts
228	Factors associated with anti-phenolic glycolipid-I seropositivity among the household contacts of leprosy cases.	Carvalho AP; da Conceição Oliveira Coelho Fabri A; Corrêa Oliveira R; Lana FC	Excluded from reading titles and abstracts
229	Complement receptor 1 (CR1, CD35) association with susceptibility to leprosy.	Kretzschmar GC; Oliveira LC; Nisihara RM; Velavan TP; Stinghen ST; Stahlke ERS; Petzl-Erler ML; Messias-Reason IJT; Boldt ABW	Excluded from reading titles and abstracts
230	Effect of a conditional cash transfer programme on leprosy treatment adherence and cure in patients from the nationwide 100 Million Brazilian Cohort: a quasi-experimental study.	Pescarini JM; Williamson E; Nery JS; Ramond A; Ichihara MY; Fiaccone RL; Penna MLF; Smeeth L; Rodrigues LC; Penna GO; Brickley EB; Barreto ML	Excluded from reading titles and abstracts
231	Hansen's disease in children under 15 years old in the state of Tocantins, Brazil, 2001-2012: epidemiological patterns and temporal trends.	Monteiro LD; Mello FRM; Miranda TP; Heukelbach J	Included
232	Association of the polymorphism of the vitamin D receptor gene (VDR) with the risk of leprosy in the Brazilian Amazon.	Paz JLP; Silvestre MDPSCA; Moura LS; Furlaneto IP; Rodrigues YC; Lima KVB; Lima LNGC	Included
233	HIV-M. leprae interaction: can HAART modify the course of leprosy?	Sarno EN; Illarramendi X; Nery JA; Sales AM; Gutierrez-Galhardo MC; Penna ML; Sampaio EP; Kaplan G	Excluded from reading titles and abstracts
234	[Leprosy trends in Tocantins, a hyperendemic State in the North of Brazil, 2001-2012].	Monteiro LD; Martins-Melo FR; Brito AL; Lima Mda S; Alencar CH; Heukelbach J	Excluded from reading titles and abstracts
235	[Epidemiological behavior of leprosy in several Latin American countries, 2011-2020Comportamento epidemiológico da hanseníase em vários países da América Latina, 2011-2020].	Cáceres-Durán MÁ	Excluded from reading titles and abstracts
236	BCG Vaccination Status, Age, and Gender as Risk Factors for Leprosy in Endemic Areas in the Brazilian Amazon.	Nepomuceno Gondim Costa Lima L; Letícia Pinto Paz J; do Perpétuo Socorro Corrêa Amador Silvestre M; Siqueira Moura L; Perini Furlaneto I; Valéria Batista Lima K	Excluded from reading titles and abstracts
237	Epidemiological, neurofunctional profile and prevalence of factors associated with the occurrence of physical disabilities due to leprosy in a reference center in Northeast Brasil: a sectional study.	Matos TS; Moura JC; Fernandes TRMO; Souza CDF	Excluded from reading titles and abstracts
238	Drug and multidrug resistance among Mycobacterium leprae isolates from Brazilian relapsed leprosy patients.	da Silva Rocha A; Cunha Md; Diniz LM; Salgado C; Aires MA; Nery JA; Gallo EN; Miranda A; Magnanini MM; Matsuoka M; Sarno EN; Suffys PN; de Oliveira ML	Excluded from reading titles and abstracts
239	Presence of intestinal helminths decreases T helper type 1 responses in tuberculoid leprosy patients and may increase the risk for multi-bacillary leprosy.	Diniz LM; Magalhães EF; Pereira FE; Dietze R; Ribeiro-Rodrigues R	Excluded from reading titles and abstracts
240	[Leprosy trends following implementation of an intervention project in a state capital in the North of Brazil, 2002-2016].	Monteiro LD; Lopes LSO; Santos PRD; Rodrigues ALM; Bastos WM; Barreto JA	Excluded from reading titles and abstracts
241	Active search for cases of leprosy in the city of Manaus.	Santos M; Pedrosa VL; Pennini SN; Sousa FHC	Excluded from reading titles and abstracts
242	[Epidemiological profile of leprosy patients in the extreme south of Santa Catarina between 2001 and 2007].	Melão S; Blanco LF; Mounzer N; Veronezi CC; Simões PW	Excluded from reading titles and abstracts
243	The wide range of clinical manifestations in leprous neuropathy: two case reports.	Koike H; Hashimoto R; Tomita M; Kawagashira Y; Iijima M; Nagamatsu M; Sobue G	Excluded from reading titles and abstracts
244	[Leprosy in Espírito Santo State, Brazil: a growing endemic?].	Moreira MV; Waldman EA; Martins CL	Excluded from reading titles and abstracts
245	[Assessment of a leprosy control program in a hyperendemic county in the State of Maranhão, Brazil, 1991-1995].	de Aquino DM; Santos JS; Costa JM	Excluded from reading titles and abstracts
246	The use of ML Flow test in school children diagnosed with leprosy in the district of Paracatu, Minas Gerais.	Ferreira IN; Ferreira IL; Evangelista Mdo S; Alvarez RR	Excluded from reading titles and abstracts
247	[Increase in leprosy detection rates in São Luís, Maranhão, Brazil, from 1993 to 1998: is the endemic expanding?].	Figueiredo IA; da Silva AA	Included
248	Reviewing the therapeutic management of leprosy in primary care: demand case series referred to a University Hospital in the Midwest region of Brazil	Sousa, Pétra Pereira de; Sousa, Ana Lúcia Maroccolo de; Turchi, Marília Dalva	Duplicate
			Excluded from reading titles and abstracts
